# Supplementary material for: Green, efficient and controllable synthesis of high-quality MOF-74 with high gravity technology
Source: Royal Society of Chemistry journal article supplement (doi:10.1039/d4gc01350f), 2024-01-01
Supplement: d4gc01350f1.pdf [file d4gc01350f1.pdf]

# Supporting Information

## Green, efficient and controllable synthesis of high-quality MOF-74 with high gravity technology

Xin-Ran Shi<sup>a,b</sup>, Meng Qiao<sup>a,b</sup>, Yan Wei<sup>b,c</sup>, Ling-Xia Yun<sup>a,b</sup>, Jie-Xin Wang<sup>a,b,\*</sup>,

Jian-Feng Chen<sup>a,b</sup>

<sup>a</sup>State Key Laboratory of Organic-Inorganic Composites, Beijing University of Chemical Technology, Beijing 100029, PR China;

<sup>b</sup>Research Center of the Ministry of Education for High Gravity Engineering and Technology, Beijing University of Chemical Technology, Beijing, 100029, PR China

<sup>c</sup>China Chengda Engineering Co.Ltd, Chengdu, 610041, China

Total number of pages: 18

Total number of Fig.s:11 (Fig.s S1-S11)

Total number of Tables:5 (Table S1-S5)

---

\* Corresponding authors:

Jie-Xin Wang, E-mail: [wangjx@mail.buct.edu.cn](mailto:wangjx@mail.buct.edu.cn) (J.X. Wang)

## Synthesis of MOF-74

**MOF-74-Co-227 nm:** The preparation process was consistent with MOF-74-Co-78 nm except that no acetic acid was added to the precursor.

**MOF-74-Co-1.86  $\mu\text{m}$ :** The preparation process was consistent with MOF-74-Co-227 nm except that the reaction temperature is 70°C.

**MOF-74-Zn:**  $\text{Zn}(\text{OAc})_2$  (2.0 g, 10.8 mmol) were dissolved in 30 mL deionized water to obtain the metal salt precursor solution, dhtp (1.07 g, 5.4 mmol) and NaOH (0.86 g, 21.6 mmol) were dissolved in 200 mL of deionized water to obtain the ligand precursor solution. The molar ratio of the reactants (Zn/dhtp/NaOH) is 2:1:4. Two streams of precursor solutions were pumped into RPB through peristaltic pumps at a flow rate of 100 mL  $\text{min}^{-1}$ , respectively. Precursors are well mixed in RPB under the rotating speeds of 1500 rpm to achieve rapid nucleation and crystallization processes at room temperature. The product is collected immediately at the outlet. MOF-74-Zn was centrifuged out of the suspension, washed three times in deionized water and methanol respectively, and then dried for 12 h at 70°C.

**MOF-74-Ni:**  $\text{Ni}(\text{OAc})_2 \cdot 4\text{H}_2\text{O}$  (2.68 g, 10.8 mmol) were dissolved in 30 mL deionized water to obtain the metal salt precursor solution, dhtp (1.07 g, 5.4 mmol) and NaOH (0.86 g, 21.6 mmol) were dissolved in 200 mL of deionized water to obtain the ligand precursor solution. The molar ratio of the reactants (Ni/dhtp/NaOH) is 2:1:4. The following process is consistent with the MOF-74-Co preparation process.



**Figure S1.** XRD patterns and N<sub>2</sub> adsorption-desorption isotherms of MOF-74-Co prepared in RPB under different reaction times.



**Figure S2.** TEM images of MOF-74-Co (a) prepared by continuous stirring in STR for 30 min, (b) prepared by stirring in STR for 10 s then left to stand for 30 min.



**Figure S3.** Particle size distributions of MOF-74-Co synthesized in RPB: (a) 500 rpm, (b) 1500 rpm, (c) 2500 rpm.



**Figure S4.** FTIR spectra of MOF-74-Co prepared at different rotating speeds.



**Figure S5.** SEM images of the MOF-74-Co synthesized at different concentrations of precursors (molar ratio of Co/dhtp/NaOH = 2/1/4): (a)  $C_{(Co)} = 45$  mM, (b)  $C_{(Co)} = 90$  mM, (c)  $C_{(Co)} = 180$  mM. (d) The average particle sizes, (e) XRD patterns, (f)  $N_2$  adsorption-desorption isotherms of the MOF-74-Co synthesized at different concentrations of precursors.



**Figure S6.** The SEM images of MOF-74-Co synthesized at different temperatures: (a) 25°C, (b) 50°C, (c) 70°C. (d) The average particle sizes (length), (e) XRD patterns, (f) N<sub>2</sub> adsorption-desorption isotherms of the MOF-74-Co synthesized at different temperatures.



**Figure S7.** SEM images of MOF-74-Co synthesized under different additions of acetic acid in STR:

(a) Without acetic acid, (b) 0.23 equiv acetic acid, (c) 0.46 equiv acetic acid.



**Figure S8.** XRD patterns of MOF-74-Co synthesized under different additions of acetic acid: (a)

RPB, (b) STR.



**Figure S9.** XPS spectra of MOF-74-Co-without HOAc and MOF-74-Co-0.46 eq.



**Figure S10.** TG curves of MOF-74-Co-0.46eq HOAc and MOF-74-Co-without HOAc in an air atmosphere.



**Figure S11.** N<sub>2</sub> adsorption-desorption isotherms at 77 K of MOF-74-Co obtained at excessive additions of acetic acid: (a) 0.92 equiv acetic acid, (b) 1.15 equiv acetic acid, (c) 1.38 equiv acetic acid.

**Table S1.** Comparison of reaction conditions, particle sizes and BET surface areas of reported MOF-74-Co.

| Samples   | Solvent                      | Reaction time | Reaction temperature | Particle sizes                         | BET ( $\text{m}^2 \text{g}^{-1}$ ) | Refs             |
|-----------|------------------------------|---------------|----------------------|----------------------------------------|------------------------------------|------------------|
| MOF-74-Co | Water                        | 30 min        | RT                   | 78 nm                                  | 1599                               | <b>This work</b> |
| a1        | Water                        | 24 h          | RT                   | 50±5 nm                                | 1572                               | 1                |
| a2        | Water                        | 1 h           | RT                   |                                        | 962                                | 1                |
| b         | Water                        | 20 h          | RT                   | 5.1 nm                                 | 521                                | 2                |
| c         | DMF/ethanol/H <sub>2</sub> O | 24 h          | 125°C                |                                        | 1080                               | 3                |
| d         | DMF/ethanol/H <sub>2</sub> O | 24 h          | 100°C                | > 50 $\mu\text{m}$                     | 1007                               | 4                |
| e1        | DMF/ethanol/H <sub>2</sub> O | 1 h           | 130°C                | 50 $\mu\text{m}$ ×<br>8 $\mu\text{m}$  | 1314                               | 5                |
| e2        | DMF/ethanol/H <sub>2</sub> O | 24 h          | 100°C                | 300 $\mu\text{m}$<br>×70 $\mu\text{m}$ | 1327                               | 5                |
| f         | water /THF                   | 3 day         | 110°C                | -                                      | 1284                               | 6                |
| g         | DMF/ethanol/H <sub>2</sub> O | 18 h          | 125°C                | -                                      | 1438                               | 7                |
| h         | methanol                     | 20 h          | RT                   | -                                      | 925                                | 8                |
| i         | DMF/ethanol/H <sub>2</sub> O | 24 h          | 100°C                | -                                      | 502                                | 9                |

**Table S2.** Comparison of synthesis condition, BET surface areas, STY and yield of MOFs using green synthesis methods.

| Methods              | MOFs                               | Solvent      | Temperature (°C) | Time (h)           | BET (m <sup>2</sup> g <sup>-1</sup> ) | STY (kg m <sup>-3</sup> day <sup>-1</sup> ) | Yield (%) | Refs             |
|----------------------|------------------------------------|--------------|------------------|--------------------|---------------------------------------|---------------------------------------------|-----------|------------------|
| High-gravity         | MOF-74-Co-0 min                    | water        | RT <sup>a</sup>  | 0.033 <sup>b</sup> | 836                                   | 4156                                        | 81        | <b>This work</b> |
|                      | MOF-74-Co-78nm                     |              |                  | 0.53 <sup>b</sup>  | 1599                                  | 293                                         | 91        | <b>This work</b> |
| Stirred tank reactor | MOF-74-Co                          | water        | RT               | 1                  | 962                                   | 1462                                        | 90        | 1                |
|                      |                                    |              |                  | 24                 | 1572                                  | 16                                          | 93        |                  |
|                      | ZIF-93                             | water        | RT               | 18                 | 604                                   | 14                                          | 79        | 10               |
|                      | HKUST-1                            | water        | RT               | 12                 | 1577                                  | 64                                          | 90        | 11               |
|                      |                                    |              |                  | 0.5                | 930                                   | 2366                                        | 94        |                  |
| MIL-100              | water                              | RT           | 24               | 1974               | -                                     | 76                                          | 12        |                  |
| Stirred Reflux       | MOF-74-Ni                          | water        | 160              | 1                  | 1355                                  | 680                                         | 92        | 13               |
|                      | MIL-160(Al)                        | water        | 100-150          | 24                 | 1150                                  | 185                                         | 93        | 14               |
| Centrifuge           | UiO-66                             | water        | RT               | 0.167              | 339                                   | 2732                                        | 79        | 15               |
| Microwave            | MOF-808                            | water        | 100              | 2                  | 2050                                  | -                                           | -         | 16               |
| Mechano-synthesis    | MIL-100(Al)                        | Solvent-Free | 240              | 18                 | 1090                                  | -                                           | 89        | 17               |
|                      | UiO-66                             | Solvent-Free | 130              | 12                 | 1115                                  | -                                           | 92        | 18               |
|                      | Cd <sub>2</sub> (BTC) <sub>3</sub> | Solvent-Free | RT               | 0.167              | 64                                    | 1.44×10 <sup>6</sup>                        | 82.5      | 19               |
|                      | MIL-100-Cr                         | Solvent-Free | 220              | 15                 | 1848                                  | -                                           | 22        | 20               |
|                      | MOF-808                            | Solvent-Free | RT               | 1                  | 702                                   | 15 g/h                                      | -         | 21               |

<sup>a</sup>RT: Room temperature

<sup>b</sup> time = feed time + synthesis time

**Table S3.** Comparison of reaction conditions, particle sizes and BET surface areas of reported MOF-74-Zn.

| MOFs      | Solvent                       | Reaction time | Reaction temperature | Particle sizes | BET (m <sup>2</sup> g <sup>-1</sup> ) | Refs             |
|-----------|-------------------------------|---------------|----------------------|----------------|---------------------------------------|------------------|
| MOF-74-Zn | Water                         | <1 s          | RT                   | 2.6×4.5 μm     | 1332                                  | <b>This work</b> |
|           | Water                         | 5 min         | RT                   |                | 1154                                  | 1                |
|           | Water                         | 10 min        | RT                   | 5.1×1.6 μm     | 1279                                  | 1                |
|           | DMF/H <sub>2</sub> O          | 20 h          | 100°C                |                | 816                                   | 3                |
|           | Water                         | 20 h          | RT                   | 3×1 μm         | 1039                                  | 22               |
|           | Tris buffer solution (pH 8.0) | 10 min        | RT                   | 8 × 2 × 1 μm   | 174                                   | 23               |

**Table S4.** Comparison of reaction conditions, particle sizes and BET surface areas of reported MOF-74-Ni.

| MOFs      | Solvent                      | Reaction time | Reaction temperature | Particle sizes | BET (m <sup>2</sup> g <sup>-1</sup> ) | Refs             |
|-----------|------------------------------|---------------|----------------------|----------------|---------------------------------------|------------------|
| MOF-74-Ni | Water                        | 30 min        | RT                   | 16 nm          | 1106                                  | <b>This work</b> |
|           | Water                        | 6 h           | RT                   | 29 nm          | 1220                                  | 1                |
|           | Water                        | 24 h          | RT                   | -              | 1351                                  | 1                |
|           | Water                        | 20 h          | RT                   | 2.8 nm         | 402                                   | 2                |
|           | DMF/ethanol/H <sub>2</sub> O | 24 h          | 100°C                | -              | 1070                                  | 3                |
|           | Water                        | 24 h          | 110°C                | 106 nm         | 1025                                  | 24               |
|           | H <sub>2</sub> O/THF         | 24 h          | 67°C                 | 33 nm          | 1081                                  | 24               |
|           | Water                        | 1 h           | 80°C                 | 1 μm           | 1233                                  | 13               |
|           | DMF/ethanol/H <sub>2</sub> O | 24 h          | 135°C                | -              | 848                                   | 25               |

**Table S5. Comparison of CO<sub>2</sub> adsorption capacity of different adsorbents.**

| <b>Types of adsorbents</b>   | <b>Sample</b>      | <b>CO<sub>2</sub> adsorption capacity (mg g<sup>-1</sup>)</b> | <b>Adsorption conditions</b> | <b>Refs</b>      |
|------------------------------|--------------------|---------------------------------------------------------------|------------------------------|------------------|
| MOF                          | MOF-74-Co-78 nm    | 298                                                           | 25°C,100 kpa                 | <b>This work</b> |
|                              | MOF-74-Co- 227 nm  | 245                                                           | 25°C,100 kpa                 | <b>This work</b> |
|                              | MOF-74-Co- 1.86 μm | 261                                                           | 25°C,100 kpa                 | <b>This work</b> |
|                              | MOF-74-Co          | 256                                                           | 25°C,100 kpa                 | 3                |
|                              | MOF-74-Co          | 288                                                           | 25°C,100 kpa                 | 5                |
|                              | MOF-74-Co          | 210                                                           | 25°C,100 kpa                 | 5                |
|                              | MOF-74-Co          | 304                                                           | 25°C,100 kpa                 | 6                |
|                              | MOF-74-Co          | 304                                                           | 25°C,100 kpa                 | 7                |
|                              | MOF-74-Co          | 107                                                           | 45°C,100 kpa                 | 26               |
|                              | CALF-20            | 179                                                           | 20°C,1.2 bar                 | 27               |
|                              | Aluminum Fumarate  | 55                                                            | 35°C, 1 bar                  | 28               |
|                              | ZIF-8              | 66                                                            | 25°C,100 kpa                 | 29               |
|                              | MIL-101(Cr)        | 101                                                           | 25°C,100 kpa                 | 30               |
|                              | MIL-53(Al)         | 95                                                            | 25°C,100 kpa                 | 31               |
|                              | UiO-66(Zr)         | 109                                                           | 25°C,100 kpa                 | 32               |
| NH <sub>2</sub> -MIL-101(Al) | 96                 | 25°C,100 kpa                                                  | 33                           |                  |
| Zeolites                     | K-X                | 182                                                           | 25°C,100 kpa                 | 34               |
|                              | Mg-X               | 211                                                           | 25°C,100 kpa                 | 34               |
|                              | Ca-X               | 241                                                           | 25°C,100 kpa                 | 34               |
|                              | Na-MER-2.3         | 176                                                           | 25°C,100 kpa                 | 35               |
|                              | Rb-gismondine      | 132                                                           | 25°C,100 kpa                 | 36               |
|                              | zeolite-13X        | 150                                                           | 25°C,100 kpa                 | 37               |
|                              | FAU zeolite        | 107                                                           | 25°C,100 kpa                 | 38               |
| Carbonaceous                 | Activated Carbon   | 79                                                            | 25°C,100 kpa                 | 39               |

|           |                                    |     |              |    |
|-----------|------------------------------------|-----|--------------|----|
| materials | Activated Carbon fibers            | 251 | 25°C,100 kpa | 40 |
|           | N-doped Carbon nanostructure (CPC) | 255 | 25°C,100 kpa | 41 |
|           | PANI-GO                            | 58  | 25°C,100 kpa | 42 |
|           | PANI-NSGO                          | 56  | 25°C,100 kpa | 42 |
| Polymers  | BINP-4                             | 13  | 25°C,100 kpa | 43 |
|           | hyper-cross-linked ionic polymers  | 121 | 0°C,100 kpa  | 44 |
|           | ADS-17                             | 264 | 25°C,0.2 Mpa | 45 |
|           | PIM-TPB-HSO3                       | 179 | 25°C,100 kpa | 46 |
|           | Ad-MALP-1                          | 89  | 25°C,100 kpa | 47 |
|           | TPPA-DMB                           | 76  | 25°C,100 kpa | 48 |

## References

- 1 L. Garzón-Tovar, A. Carné-Sánchez, C. Carbonell, I. Imaz and D. Maspoch, *J. Mater. Chem. A*, 2015, **3**, 20819-20826.
- 2 M. Díaz-García, Á. Mayoral, I. Díaz and M. Sánchez-Sánchez, *Cryst. Growth Des.*, 2014, **14**, 2479-2487.
- 3 S. R. Caskey, A. G. Wong-Foy and A. J. Matzger, *J. Am. Chem. Soc.*, 2008, **130**, 10870-10871.
- 4 H. Jiang, Q. Wang, H. Wang, Y. Chen and M. Zhang, *ACS Appl. Mater. Interfaces*, 2016, **8**, 26817-26826.
- 5 H.-Y. Cho, D.-A. Yang, J. Kim, S.-Y. Jeong and W.-S. Ahn, *Catal. Today*, 2012, **185**, 35-40.
- 6 D. Yu, A. O. Yazaydin, J. R. Lane, P. D. C. Dietzel and R. Q. Snurr, *Chem. Sci.*, 2013, **4**, 3544-3556.
- 7 W. L. Queen, M. R. Hudson, E. D. Bloch, J. A. Mason, M. I. Gonzalez, J. S. Lee, D. Gygi, J. D. Howe, K. Lee, T. A. Darwish, M. James, V. K. Peterson, S. J. Teat, B. Smit, J. B. Neaton, J. R. Long and C. M. Brown, *Chem. Sci.*, 2014, **5**, 4569-4581.
- 8 J. G. Flores, M. Díaz-García, I. A. Ibarra, J. Aguilar-Pliego and M. Sánchez-Sánchez, *J. Solid State Chem.*, 2021, **298**, 122151.
- 9 X. Deng, L. Yang, H. Huang, Y. Yang, S. Feng, M. Zeng, Q. Li and D. Xu, *Small*, 2019, **15**, 1902287.
- 10 E. V. Ramos-Fernandez, A. Grau-Atienza, D. Farrusseng and S. Aguado, *J. Mater. Chem. A*, 2018, **6**, 5598-5602.

- 11 C. Duan, F. Li, L. Li, H. Zhang, X. Wang, J. Xiao and H. Xi, *CrystEngComm*, 2018, **20**, 1057-1064.
- 12 K. Guesh, C. A. D. Caiuby, Á. Mayoral, M. Díaz-García, I. Díaz and M. Sanchez-Sanchez, *Cryst. Growth Des.*, 2017, **17**, 1806-1813.
- 13 S. Cadot, L. Veyre, D. Luneau, D. Farrusseng and E. Alessandra Quadrelli, *J. Mater. Chem. A*, 2014, **2**, 17757-17763.
- 14 A. Permyakova, O. Skrylnyk, E. Courbon, M. Affram, S. Wang, U. H. Lee, A. H. Valekar, F. Nouar, G. Mouchaham, T. Devic, G. De Weireld, J.-S. Chang, N. Steunou, M. Frère and C. Serre, *ChemSusChem*, 2017, **10**, 1419-1426.
- 15 L. Huelsenbeck, H. Luo, P. Verma, J. Dane, R. Ho, E. Beyer, H. Hall, G. M. Geise and G. Giri, *Cryst. Growth Des.*, 2020, **20**, 6787-6795.
- 16 L. González, R. Gil-San-Millán, J. A. R. Navarro, C. R. Maldonado, E. Barea and F. J. Carmona, *J. Mater. Chem. A*, 2022, **10**, 19606-19611.
- 17 J. Li, M. J. Hurlock, V. G. Goncharov, X. Li, X. Guo and Q. Zhang, *Inorg. Chem.*, 2021, **60**, 4623-4632.
- 18 G. Ye, D. Zhang, X. Li, K. Leng, W. Zhang, J. Ma, Y. Sun, W. Xu and S. Ma, *ACS Appl. Mater. Interfaces*, 2017, **9**, 34937-34943.
- 19 Z. Guo, Q. Zhang, Z. Cheng, Q. Liu, J. Zuo, B. Jin and R. Peng, *ACS Sustainable Chem. Eng.*, 2020, **8**, 4037-4043.
- 20 Y. Mao, H. Qi, G. Ye, L. Han, W. Zhou, W. Xu and Y. Sun, *Microporous Mesoporous Mater.*, 2019, **274**, 70-75.

- 21 C. Jin, S. Shi, S. Liao, S. Liu, S. Xia, Y. Luo, S. Wang, H. Wang and C. Chen, *Chem. Mater.*, 2023, **35**, 4489-4497.
- 22 M. Sánchez-Sánchez, N. Getachew, K. Díaz, M. Díaz-García, Y. Chebude and I. Díaz, *Green Chem.*, 2015, **17**, 1500-1509.
- 23 P.-H. Hsu, C.-C. Chang, T.-H. Wang, P. K. Lam, M.-Y. Wei, C.-T. Chen, C.-Y. Chen, L.-Y. Chou and F.-K. Shieh, *ACS Appl. Mater. Interfaces*, 2021, **13**, 52014-52022.
- 24 J. Guasch, P. D. C. Dietzel, P. Collier and N. Acerbi, *Microporous Mesoporous Mater.*, 2015, **203**, 238-244.
- 25 S. Xie, Q. Qin, H. Liu, L. Jin, X. Wei, J. Liu, X. Liu, Y. Yao, L. Dong and B. Li, *ACS Appl. Mater. Interfaces*, 2020, **12**, 48476-48485.
- 26 J. Tapiador, E. García-Rojas, P. López-Patón, G. Calleja, G. Orcajo, C. Martos and P. Leo, *J. Environ. Chem. Eng.*, 2023, **11**, 109497.
- 27 J.-B. Lin, T. T. T. Nguyen, R. Vaidhyanathan, J. Burner, J. M. Taylor, H. Durekova, F. Akhtar, R. K. Mah, O. Ghaffari-Nik, S. Marx, N. Fylstra, S. S. Iremonger, K. W. Dawson, P. Sarkar, P. Hovington, A. Rajendran, T. K. Woo and G. K. H. Shimizu, *Science*, 2021, **374**, 1464-1469.
- 28 Y. Ding, L. Ma, F. Zeng, X. Zhao, H. Wang, X. Zhu and Q. Liao, *Energy*, 2023, **263**, 125723.
- 29 Z. Li, B. He and S. Tang, *CrystEngComm*, 2024, **26**, 70-79.
- 30 C. Chen, N. Feng, Q. Guo, Z. Li, X. Li, J. Ding, L. Wang, H. Wan and G. Guan, *JJ. Colloid Interface Sci.*, 2018, **513**, 891-902.

- 31 L. Sun, M. Yin, Z. Li and S. Tang, *J. Ind. Eng. Chem.*, 2022, **112**, 279-286.
- 32 V. N. Le, T. K. Vo, K. S. Yoo and J. Kim, *Sep. Purif. Technol.*, 2021, 274, 119079.
- 33 M. Babar, M. Mubashir, A. Mukhtar, S. Saqib, S. Ullah, M. A. Bustam and P. L. Show, *Environ. Pollut.*, 2021, **279**, 116924
- 34 A. M. Najafi, F. Khorasheh, S. Soltanali and H. Ghassabzadeh, *Langmuir*, 2023, **39**, 15535-15546.
- 35 H. J. Choi, D. Jo, J. G. Min and S. B. Hong, *Angew. Chem. Int. Ed.*, 2021, **60**, 4307-4314.
- 36 H. J. Choi, J. G. Min, S. H. Ahn, J. Shin, S. B. Hong, S. Radhakrishnan, C. V. Chandran, R. G. Bell, E. Breynaert and C. E. A. Kirschhock, *Mater. Horizons*, 2020, **7**, 1528-1532.
- 37 J. Hedlund, G. Garcia, M. Balsamo, M. Zhou and J. Mouzon, *Sep. Purif. Technol.*, 2021, **277**, 119483.
- 38 Y. Zhou, Y. Li, X. Yuan, G. Hou, M. Chu, H. Kang, W. Qin and X. Wu, *Sep. Purif. Technol.*, 2023, **325**, 124729.
- 39 J. Wang, L. Huang, R. Yang, Z. Zhang, J. Wu, Y. Gao, Q. Wang, D. O'Hare and Z. Zhong, *Energy Environ. Sci.*, 2014, **7**, 3478-3518.
- 40 X. Li, Y. Jin, Q. Xue, L. Zhu, W. Xing, H. Zheng and Z. Liu, *J. CO<sub>2</sub> Util.*, 2017, **18**, 275-282.
- 41 J. Zhou, Z. Li, W. Xing, H. Shen, X. Bi, T. Zhu, Z. Qiu and S. Zhuo, *Adv. Funct. Mater.*, 2016, **26**, 7955-7964.

- 42 S. Rodríguez-García, R. Santiago, D. López-Díaz, M. D. Merchán, M. M. Velázquez, J. L. G. Fierro and J. Palomar, *ACS Sustainable Chem. Eng.*, 2019, **7**, 12464-12473.
- 43 M. Maruthapandi, L. Eswaran, R. Cohen, N. Perkas, J. H. T. Luong and A. Gedanken, *Langmuir*, 2020, **36**, 4280-4288.
- 44 C. Li, H. Cai, X. Yang, F. Liu, C. Yang, P. Chen, Z. Chen and T. Zhao, *J. CO<sub>2</sub> Util.*, 2022, **64**, 102203.
- 45 H. Yang, X. Wang, J. Liu, W. Liu, Y. Gong and Y. Sun, *Chem. Eng. J.*, 2022, **430**, 132899.
- 46 H. Zhou, C. Rayer, A. R. Antonangelo, N. Hawkins and M. Carta, *ACS Appl. Mater. Interfaces*, 2022, **14**, 20997-21006.
- 47 M. Rong, L. Yang, C. Yang, J. Yu and H. Liu, *Microporous Mesoporous Mater.*, 2021, **323**, 111206.
- 48 E. Cucu, E. Dalkılıç, R. Altundas and A. E. Sadak, *Microporous Mesoporous Mater.*, 2022, **330**, 111567.
